# Supplementary material
Source: ML conference proceedings conference paper supplement (https://proceedings.neurips.cc/paper_files/paper/2019/hash/800b03685c22049f049801f6841861a2-Abstract.html)
Supplement: Supplementary file [file 800b03685c22049f049801f6841861a2-Supplemental.zip]

---

# Supplementary Material: Unified Sample-Optimal Property Estimation in Near-Linear Time

---

**Yi Hao**

Dept. of Electrical and Computer Engineering  
University of California, San Diego  
yih179@ucsd.edu

**Alon Orlitsky**

Dept. of Electrical and Computer Engineering  
University of California, San Diego  
alon@ucsd.edu

## Outline

The supplementary material is organized as follows.

Section 1: We address function estimation and prove Theorem 4 in the main paper. Our objective is to design a small-bias estimator whose approximation value is highly concentrated around its mean.

Section 1.1: We present several ancillary results that will be used in subsequent proofs.

Section 1.2: We construct the function estimator  $\hat{g}^*$  using piecewise min-max polynomials.

Section 1.3, 1.4, and 1.5: We derive the bias, variance, and tail probability bounds presented in Theorem 4, respectively, showing that the estimator  $\hat{g}^*$  admits strong theoretical guarantees for a broad class of functions.

In particular, in Section 1.5.1, we establish a McDiarmid’s inequality under Poisson sampling, which is of independent interest.

Section 2: We apply the function estimation technique derived in Section 1 to derive our generic method for learning additive properties, and prove other theorems in the main paper.

Section 2.1: We establish the results in Theorem 5 and show that for all sufficiently smooth properties, our property estimator  $\hat{f}^*$  achieves the state-of-the-art performance.

Section 2.2: We consider the problem of estimating Lipschitz properties. By proving Theorem 1, we show for the first time that all Lipschitz properties can be estimated up to a small error  $\varepsilon$  using  $\mathcal{O}(k/(\varepsilon^2 \log k))$  samples, with probability at least  $2/3$ .

Section 2.3: We establish a general result on private property estimation, which trivially implies those stated in Section 2.2 of the main paper.

Section 2.4: We utilize Theorem 5 and some specific constructions to prove the upper and lower bounds in Theorem 2, respectively.

# 1 Proof of Theorem 4: Estimating functions of Bernoulli probabilities

## 1.1 Ancillary results

### Useful tools

The following two lemmas provide tight bounds on the tail probability of a Poisson or binomial random variable. We use these inequalities throughout the proofs.

**Lemma 1** (Chernoff Bound [2]). *Let  $X$  be a Poisson or binomial random variable with mean  $\mu$ , then for any  $\delta > 0$ ,*

$$\mathbb{P}(X \geq (1 + \delta)\mu) \leq \left( \frac{e^\delta}{(1 + \delta)^{(1 + \delta)}} \right)^\mu \leq e^{-(\delta^2 \wedge \delta)\mu/3}$$

and for any  $\delta \in (0, 1)$ ,

$$\mathbb{P}(X \leq (1 - \delta)\mu) \leq \left( \frac{e^{-\delta}}{(1 - \delta)^{(1 - \delta)}} \right)^\mu \leq e^{-\delta^2 \mu/2}.$$

By setting  $\delta$  to be  $1/2$  and  $1$  in Lemma 1, we have the following corollary.

**Lemma 2.** *Let  $X$  be a Poisson or binomial random variable with mean  $\mu$ , then*

$$\mathbb{P}(X \leq \frac{1}{2}\mu) \leq e^{-0.15\mu}$$

and

$$\mathbb{P}(X \geq 2\mu) \leq e^{-0.38\mu}.$$

The  $n$ -sensitivity of an estimator  $\hat{f}$  is the maximum possible change in its value when a sample sequence of size- $n$  input sequence is modified at exactly one location,

$$S(\hat{f}, n) := \max\{|\hat{f}(x^n) - \hat{f}(y^n)| : x^n \text{ and } y^n \text{ differ in one location}\}.$$

The McDiarmid's inequality relates  $S(\hat{f}, n)$  to the tail probability of  $\hat{f}(X^n)$ .

**Lemma 3** (McDiarmid's inequality [7]). *Let  $\hat{f}$  be an estimator. For any constant  $\varepsilon > 0$ , distribution  $\vec{p} \in \Delta_k$ , and i.i.d. sample sequence  $X^n \sim \vec{p}$ ,*

$$\Pr\left(|\hat{f}(X^n) - \mathbb{E}[\hat{f}(X^n)]| > \varepsilon\right) \leq 2 \exp\left(-\frac{2\varepsilon^2}{nS^2(\hat{f}, n)}\right).$$

As illustrated in the main paper, our construction relies on a variety of polynomials. To analyze these polynomials and relate them to other quantities, we often need to bound the polynomials' coefficients based on their ranges. For a real polynomial, the next lemma provides tight upper bounds on the magnitude of its non-constant coefficients.

**Lemma 4.** *Let  $p(x) = \sum_{j=0}^d a_j x^j$  be a degree- $d$  real polynomial and*

$$A := \sup_{x_1, x_2 \in [0, 1]} |p(x_1) - p(x_2)|,$$

then for  $j \geq 1$ ,

$$|a_j| \leq A \cdot 2^{3.5d}.$$

We will utilize the above lemma to bound the variance of polynomial-based estimators.

### Unbiased estimator of $(p - x)^v$ and its characterization

The following polynomial is related to the unbiased estimator of  $(p - x)^v$  under *Poisson sampling*, where we make the sample size an independent Poisson random variable. Note that both  $x \in \mathbb{R}$  and  $v \in \mathbb{N}$  are given constant parameters.

$$h_{v,x}(y) := \sum_{l=0}^v \binom{v}{l} (-x)^{v-l} \prod_{l'=0}^{l-1} \left(\frac{y}{n} - \frac{l'}{n}\right).$$

This polynomial will play an important role in our consecutive constructions and corresponding proofs. First, we establish and present several useful attributes of  $h_{v,x}(y)$  below.

**Lemma 5.** For a Poisson random variable  $Y \sim \text{Poi}(np)$ ,

$$\mathbb{E}[h_{v,x}(Y)] = (p - x)^v.$$

*Proof.* By the linearity of expectation and definition of Poisson random variables,

$$\begin{aligned} \mathbb{E}[h_{v,x}(Y)] &= \sum_{l=0}^v \binom{v}{l} (-x)^{v-l} \mathbb{E} \left[ \prod_{l'=0}^{l-1} \left( \frac{Y}{n} - \frac{l'}{n} \right) \right] \\ &= \sum_{l=0}^v \binom{v}{l} (-x)^{v-l} \frac{1}{n^l} \mathbb{E} \left[ \prod_{l'=0}^{l-1} (Y - l') \right] \\ &= \sum_{l=0}^v \binom{v}{l} (-x)^{v-l} \frac{e^{-np}}{n^l} \sum_{j=0}^{\infty} \frac{(np)^j}{j!} \prod_{l'=0}^{l-1} (j - l') \\ &= \sum_{l=0}^v \binom{v}{l} (-x)^{v-l} \frac{e^{-np}}{n^l} \sum_{j=l}^{\infty} \frac{(np)^j}{(j-l)!} \\ &= \sum_{l=0}^v \binom{v}{l} (-x)^{v-l} \frac{(np)^l}{n^l} \left( e^{-np} \sum_{j=l}^{\infty} \frac{(np)^{j-l}}{(j-l)!} \right) \\ &= \sum_{l=0}^v \binom{v}{l} (-x)^{v-l} p^l \\ &= (x - p)^v. \end{aligned} \quad \square$$

Lemma 5 implies that polynomial  $h_{v,x}(Y)$  is the unbiased estimator of  $(\mathbb{E}[Y]/n - x)^v$  for  $Y \sim \text{Poi}(\cdot)$ . The next three lemmas bound the polynomial's value when the input variable is close to its expectation.

**Lemma 6.** For a Poisson random variable  $Y \sim \text{Poi}(np)$ ,

$$\mathbb{E}[h_{v,0}^2(Y)] \leq \frac{\mathbb{E}[Y^{2v}]}{n^{2v}}.$$

Furthermore, if for some positive constant  $c'$ , both  $np$  and  $2v$  are at most  $\leq c' \log n$ ,

$$\mathbb{E}[h_{v,0}^2(Y)] \leq 2p \left( \frac{2c' \log n}{n} \right)^{2v-1}.$$

*Proof.* We consider the first inequality. Note that for all  $y \in \mathbb{Z}^+$ ,

$$0 \leq \prod_{l'=0}^{v-1} (y - l') = \mathbb{1}_{y \geq v} \cdot \prod_{l'=0}^{v-1} (y - l') \leq y^v.$$

This inequality trivially implies that

$$\mathbb{E}[h_{v,0}^2(Y)] = \frac{1}{n^{2v}} \mathbb{E} \left( \prod_{l'=0}^{v-1} (Y - l') \right)^2 \leq \frac{\mathbb{E}[Y^{2v}]}{n^{2v}}.$$

Based on the first inequality, we prove the second one as follows.

$$\begin{aligned} \mathbb{E}[h_{v,0}^2(Y)] &\leq \frac{\mathbb{E}[Y^{2v}]}{n^{2v}} \\ &\leq \frac{1}{n^{2v}} \sum_{t=1}^{2v} t^{2v-t} \binom{2v}{t} (np)^t \\ &\leq \frac{1}{n^{2v}} \sum_{t=1}^{2v} (2v)^{2v-t} \binom{2v}{t} (c' \log n)^t \frac{np}{c' \log n} \\ &\leq \frac{1}{n^{2v}} (2v + c' \log n)^{2v} \frac{np}{c' \log n} \\ &\leq 2p \left( \frac{2c' \log n}{n} \right)^{2v-1}. \end{aligned} \quad \square$$

**Lemma 7.** [6] For a Poisson random variable  $Y \sim \text{Poi}(np)$  and a parameter

$$M \geq \max \left\{ \frac{n(p-x)^2}{p}, v \right\},$$

we have

$$\mathbb{E}[h_{v,0}^2(Y)] \leq \left( \frac{2Mp}{n} \right)^v.$$

**Lemma 8.** [4] For  $x \in [0, 1]$ ,  $v \in \mathbb{N}$ ,  $m \in \mathbb{N}$ , and a parameter

$$\delta \geq \max \left\{ \left| x - \frac{m}{n} \right|, \frac{\sqrt{4mv}}{n} \right\},$$

we have

$$|h_{v,x}(m)| \leq (2\delta)^v.$$

## 1.2 Function estimator construction

Let  $g$  be a continuous real function over the unit interval. Given i.i.d. samples  $X^n$  from a Bernoulli distribution with unknown success probability  $p$ , our objective is to estimate the function value  $g(p)$ .

**Poisson sampling and sample splitting** Generating exactly  $n$  samples creates dependencies between the counts of symbols. To simplify the derivations, we use the well-known *Poisson sampling* technique and make the sample size an independent Poisson variable  $N$  with mean  $n$ . In addition, we apply the standard *sample splitting* method and divide the sample sequence  $X^N$  into two sub-sample sequences by independently putting each sample into one of the two with equal probability. Equivalently, we can simply generate two independent sample sequences from  $\text{Bern}(p)$ , each of an independent  $\text{Poi}(n/2)$  size. For notational convenience, we replace  $n$  by  $2n$  and denote by  $N_1$  and  $N'_1$  the number of times symbol 1 appearing in the first and second sample sequences, respectively.

**Covering the unit interval** Let  $c$  be a sufficiently large constant and define  $c_n := c \frac{\log n}{n}$ . Cover the unit interval  $[0, 1]$  by three sets of nested intervals

$$\begin{aligned} I_j &:= c_n [(j-1)^2, j^2], \\ I_j^* &:= c_n [(j-2)^2 \mathbf{1}_{j \geq 2}, (j+1)^2] = \bigcup_{j'=j-1}^{j+1} I_{j'}, \\ I_j^{**} &:= c_n [(j-3)^2 \mathbf{1}_{j \geq 3}, (j+2)^2] = \bigcup_{j'=j-1}^{j+1} I_{j'}^*, \end{aligned}$$

where  $j = 1, \dots$  and in the union,  $I_{-2}$  and  $I_{-1}$  are taken to be empty.

Let  $M_n := 1/\sqrt{c_n}$  be the number of intervals so that  $I_1, \dots, I_{M_n}$  form a partition of  $[0, 1]$ .

Parameter  $c$  and these intervals are chosen so that for all  $j \in [M_n]$ , if  $N_1/n \in I_j$  we can assume that  $p \in I_j^*$  and  $N'_1/n \in I_j^{**}$ , and regardless of the value of  $p$ , with high probability we will be right.

**Min-max polynomial approximation** For each  $j \in [M_n]$ , let  $x_j := c_n(j-3)^2 \mathbf{1}_{j \geq 3}$  be the left end point of  $I_j^{**}$ , and  $|I_j^{**}| := c_n(j+2)^2 - c_n(j-3)^2 \mathbf{1}_{j \geq 3}$  be the length of the interval  $I_j^{**}$ .

Then for any  $x \in I_j^{**}$ , there exists  $y_x \in [0, 1]$  such that  $x = x_j + |I_j^{**}| \cdot y_x$ . Let  $\lambda$  be a small absolute constant in  $(0, 0.1)$ , and define the *degree parameter* as

$$d_n := \max \{ d \in \mathbb{N} : d \cdot 2^{4.5d+2} \leq n^\lambda \}.$$

Denoting

$$r_j(y) := g(x_j + |I_j^{**}|y),$$

we can find the degree- $d_n$  min-max polynomial of  $r_j(y)$  over  $y \in [0, 1]$ , say

$$\tilde{r}_j(y) := \sum_{v=0}^{d_n} a_{jv} y^v.$$

By Lemma 4, for all  $v \geq 1$ , the following upper bound on  $|a_{jv}|$  holds.

$$|a_{jv}| \leq 2^{3.5d_n} \sup_{z_1, z_2 \in I_j^{**}} |g(z_1) - g(z_2)|.$$

Noting that  $y_x = |I_j^{**}|^{-1}(x - x_j)$ , we can re-write  $\tilde{r}_j(y_x)$  as

$$\tilde{g}_j(x) := \sum_{v=0}^{d_n} a_{jv} |I_j^{**}|^{-v} (x - x_j)^v.$$

**Piecewise-polynomial estimator  $\hat{g}^*$**  By Lemma 5, for  $j \in [M_n]$ , an unbiased estimator of  $\tilde{g}_j(p)$  is

$$E_{\tilde{g}_j}(N_1) := \sum_{v=0}^{d_n} a_{jv} |I_j^{**}|^{-v} h_{v, x_j}(N_1) = \sum_{v=0}^{d_n} a_{jv} |I_j^{**}|^{-v} \sum_{l=0}^v \binom{v}{l} (-x_j)^{v-l} \prod_{l'=0}^{l-1} \left( \frac{N_1}{n} - \frac{l'}{n} \right).$$

For  $j > M_n$ , we denote

$$E_{\tilde{g}_j}(N_1) := E_{\tilde{g}_{M_n}}(\min\{N_1, c_n(M_n + 2)^2\}).$$

Let  $T$  be a sufficiently large constant satisfying  $T \gg \max_{x \in [0,1]} |g(x)|$ , and write  $[A]_a^b$  instead of  $\min\{\max\{A, a\}, b\}$ . Utilizing sample splitting, we estimate  $g(p)$  by the following estimator,

$$\hat{g}^*(N_1, N'_1) := \left[ \sum_{j=1}^{\infty} \left( E_{\tilde{g}_j}(N_1) \mathbb{1}_{\frac{N_1}{n} \in I_j^{**}} + \sum_{j' \notin [j-2:j+2]} E_{\tilde{g}_{j'}}(N_1) \mathbb{1}_{\frac{N_1}{n} \in I_{j'}} \right) \mathbb{1}_{\frac{N'_1}{n} \in I_j} \right]_{-T}^T.$$

### 1.3 Bounding the bias of $\hat{g}^*$

Recall that  $I_1, \dots, I_{M_n}$  form a partition of  $[0, 1]$ . For any  $x \in [0, 1]$ , let  $j_x$  denote the index  $j$  such that  $x \in I_j$ . By the triangle inequality, the absolute bias of  $\hat{g}^*(N_1, N'_1)$  admits

$$\begin{aligned} |\mathbb{E}[\hat{g}^*(N_1, N'_1)] - g(p)| &\leq |\tilde{g}_{j_p}(p) - g(p)| + |\mathbb{E}[\hat{g}^*(N_1, N'_1) - \tilde{g}_{j_p}(p)]| \\ &\leq |\tilde{g}_{j_p}(p) - g(p)| + \mathbb{E} \left[ 2T \left( \mathbb{1}_{\frac{N_1}{n} \notin I_{j_p}^*} \mathbb{1}_{\frac{N'_1}{n} \in I_{j_p}^*} + \mathbb{1}_{\frac{N'_1}{n} \notin I_{j_p}^*} \right) \right] \\ &\quad + \left| \mathbb{E} \left[ \left( \hat{g}^*(N_1, N'_1) - \tilde{g}_{j_p}(p) \right) \mathbb{1}_{\frac{N_1}{n} \in I_{j_p}^*} \mathbb{1}_{\frac{N'_1}{n} \in I_{j_p}^*} \right] \right|. \end{aligned}$$

The last summation has three terms. By definition, the first term is no larger than  $D_g^*(n, p)/n$ . By the Chernoff bound (Lemma 1) and the fact that  $p \in I_{j_p}$ , for sufficiently large constant  $c$ , the second term is at most  $Tp/n^5$ . Therefore, it remains to consider the third term. By the triangle inequality and definition of  $\hat{g}^*$ , the third term is at most

$$\begin{aligned} B_n(g, p) &:= \left| \mathbb{E} \left[ \left( \tilde{g}_{j_p-1}(p) - \tilde{g}_{j_p}(p) \right) \mathbb{1}_{\frac{N_1}{n} \in I_{j_p}^*} \right] \right| + \left| \mathbb{E} \left[ \left( \tilde{g}_{j_p+1}(p) - \tilde{g}_{j_p}(p) \right) \mathbb{1}_{\frac{N_1}{n} \in I_{j_p}^*} \right] \right| \\ &\quad + \left| \mathbb{E} \left[ \left( E_{\tilde{g}_{j_p}}(N_1) - \tilde{g}_{j_p}(p) \right) \mathbb{1}_{\frac{N_1}{n} \in I_{j_p}^*} \right] \right| + \left| \mathbb{E} \left[ \left( E_{\tilde{g}_{j_p-1}}(N_1) - \tilde{g}_{j_p-1}(p) \right) \mathbb{1}_{\frac{N_1}{n} \in I_{j_p}^*} \right] \right| \\ &\quad + \left| \mathbb{E} \left[ \left( E_{\tilde{g}_{j_p+1}}(N_1) - \tilde{g}_{j_p+1}(p) \right) \mathbb{1}_{\frac{N_1}{n} \in I_{j_p}^*} \right] \right|. \end{aligned}$$

We bound the first term of  $B_n(g, p)$  as

$$\begin{aligned} \left| \mathbb{E} \left[ \left( \tilde{g}_{j_p-1}(p) - \tilde{g}_{j_p}(p) \right) \mathbb{1}_{\frac{N_1}{n} \in I_{j_p}^*} \right] \right| &\leq |\mathbb{E}[\tilde{g}_{j_p-1}(p) - \tilde{g}_{j_p}(p)]| \\ &\leq |\tilde{g}_{j_p-1}(p) - g(p)| + |g(p) - \tilde{g}_{j_p}(p)| \\ &\leq \frac{2D_g^*(2n, p)}{n}, \end{aligned}$$

where the last step follows from the definition of  $D_g^*(2n, p)$ . The second term of  $B_n(g, p)$  satisfies the same inequality, and is at most  $2D_g^*(2n, p)/n$ . Note that the last three terms of  $B_n(g, p)$  are clearly of the same type. Hence for simplicity, below we only analyze the first one.

For any  $j \in [M_n]$ , we can express  $E_{\tilde{g}_j}(N_1)$  in terms of  $h_{v, x_j}(N_1)$ , i.e.,

$$E_{\tilde{g}_j}(N_1) = \sum_{v=0}^{d_n} a_{jv} |I_j^{**}|^{-v} h_{v, x_j}(N_1).$$

In addition, recall that by definition,

$$\tilde{g}_j(p) = \sum_{v=0}^{d_n} a_{jv} |I_j^{**}|^{-v} (p - x_j)^v.$$

The linearity of expectation combines the above two equalities and yields

$$\mathbb{E} \left[ \left( E_{\tilde{f}_j}(N_1) - \tilde{f}_j(p) \right) \mathbb{1}_{\frac{N_1}{n} \in I_j^*} \right] = \sum_{v=0}^{d_n} a_{jv} |I_j^{**}|^{-v} \mathbb{E} \left[ \left( h_{v, x_j}(N_1) - (p - x_j)^v \right) \mathbb{1}_{\frac{N_1}{n} \in I_j^*} \right].$$

Therefore, given integers  $a$  and  $b$  satisfying  $b > a > d_n$ , our *new objective* is to bound

$$IN_{v,n}(a, b, p, j) := \mathbb{E} \left[ \left( h_{v, x_j}(N_1) - (p - x_j)^v \right) \mathbb{1}_{N_1 \in [a, b]} \right].$$

**Bounding the magnitude of  $IN_{v,n}$**  For all integer  $s \geq 1$ , let us denote

$$H_{v,n}(s, p, j) := \sum_{l=0}^v \binom{v}{l} (-x_j)^{v-l} p^l \sum_{t \in [s-l, s-1]} e^{-np} \frac{(np)^t}{t!}.$$

We first relate  $IN_{v,n}$  to  $H_{v,n}$  through the following lemma.

**Lemma 9.** *For any two integers  $a$  and  $b$  satisfying  $a > b > v$ ,*

$$IN_{v,n}(a, b, p, j) = H_{v,n}(a, p, j) - H_{v,n}(b+1, p, j).$$

*Proof.* By the linearity of expectation and binomial theorem, we can rewrite the left-hand side as

$$IN_{v,n}(a, b, p, j) = \sum_{l=0}^v \binom{v}{l} (-x_j)^{v-l} \mathbb{E} \left[ \left( \prod_{l'=0}^{l-1} \left( \frac{N_1}{n} - \frac{l'}{n} \right) - p^l \right) \mathbb{1}_{N_1 \in [a, b]} \right].$$

For each  $l \leq v$ , we evaluate the inner expectation as follows:

$$\begin{aligned} \mathbb{E} \left[ \left( \prod_{l'=0}^{l-1} \left( \frac{N_1}{n} - \frac{l'}{n} \right) - p^l \right) \mathbb{1}_{N_1 \in [a, b]} \right] &= \sum_{t \in [a, b]} \prod_{l'=0}^{l-1} \left( \frac{t}{n} - \frac{l'}{n} \right) e^{-np} \frac{(np)^t}{t!} - p^l \sum_{t \in [a, b]} e^{-np} \frac{(np)^t}{t!} \\ &= \sum_{t \in [a, b]} \frac{1}{n^l} \frac{t!}{(t-l)!} e^{-np} \frac{(np)^t}{t!} - p^l \sum_{t \in [a, b]} e^{-np} \frac{(np)^t}{t!} \\ &= p^l \sum_{t \in [a-l, b-l]} e^{-np} \frac{(np)^t}{t!} - p^l \sum_{t \in [a, b]} e^{-np} \frac{(np)^t}{t!} \\ &= p^l \sum_{t \in [a-l, a-1]} e^{-np} \frac{(np)^t}{t!} - p^l \sum_{t \in [b-l+1, b]} e^{-np} \frac{(np)^t}{t!}. \quad \square \end{aligned}$$

Therefore, to bound  $|IN_{v,n}(a, b, p, j)|$ , we only need to bound  $|H_{v,n}(a, p, j)|$  and  $|H_{v,n}(b+1, p, j)|$ . We shall proceed by relating these quantities to  $h_{l, x_j}(a-1)$  for  $l = 0, \dots, v-1$ .

**Lemma 10.** *For any integer  $s$  satisfying  $s > v$ ,*

$$H_{v,n}(s, p, j) = p e^{-np} \frac{(np)^{s-1}}{(s-1)!} \sum_{l=0}^{v-1} (p - x_j)^{v-l-1} h_{l, x_j}(s-1).$$

*Proof.* The following recursive formula of binomial coefficients is well-known:

$$\binom{v}{l} = \binom{v-1}{l} + \binom{v-1}{l-1},$$

Utilizing this recursive formula, we can re-write the quantity of interest as

$$\begin{aligned}
H_{v,n}(s, p, j) &= \sum_{l=0}^{v-1} \binom{v-1}{l} (-x_j)^{v-(l+1)} p^{l+1} \sum_{t \in [s-l, s-1]} e^{-np} \frac{(np)^t}{t!} \\
&+ \sum_{l=0}^{v-1} \binom{v-1}{l} (-x_j)^{v-l} p^l \sum_{t \in [s-l, s-1]} e^{-np} \frac{(np)^t}{t!} \\
&+ \sum_{l=0}^{v-1} \binom{v-1}{l} (-x_j)^{v-(l+1)} p^{l+1} e^{-np} \frac{(np)^t}{t!} \Big|_{t=s-(l+1)} \\
&= (p - x_j) \sum_{l=0}^{v-1} \binom{v-1}{l} (-x_j)^{(v-1)-l} p^l \sum_{t \in [s-l, s-1]} e^{-np} \frac{(np)^t}{t!} \\
&+ \sum_{l=0}^{v-1} \binom{v-1}{l} (-x_j)^{v-(l+1)} p^{l+1} e^{-np} \frac{(np)^{s-(l+1)}}{(s-(l+1))!} \\
&= (p - x_j) H_{v-1,n}(s, p, j) + \sum_{l=0}^{v-1} \binom{v-1}{l} (-x_j)^{v-(l+1)} p^{l+1} e^{-np} \frac{(np)^{s-(l+1)}}{(s-(l+1))!}.
\end{aligned}$$

This equation establishes a standard recursive relation between  $H_{v,n}(s, p, j)$  and  $H_{v-1,n}(s, p, j)$ . To prove our desired result, we relate the second quantity on the right-hand side to  $h_{v-1,x_j}(s-1)$ ,

$$\begin{aligned}
&\sum_{l=0}^{v-1} \binom{v-1}{l} (-x_j)^{v-(l+1)} p^{l+1} e^{-np} \frac{(np)^{s-(l+1)}}{(s-(l+1))!} \\
&= e^{-np} p \sum_{l=0}^{v-1} \binom{v-1}{l} (-x_j)^{(v-1)-l} p^l \frac{(np)^{(s-1)-l}}{((s-1)-l)!} \\
&= e^{-np} p \sum_{l=0}^{v-1} \binom{v-1}{l} (-x_j)^{(v-1)-l} \frac{1}{n^l} \frac{(np)^{s-1}}{((s-1)-l)!} \\
&= e^{-np} p \sum_{l=0}^{v-1} \binom{v-1}{l} (-x_j)^{(v-1)-l} \frac{\prod_{l'=0}^{l-1} ((s-1)-l')}{n^l} \frac{(np)^{s-1}}{(s-1)!} \\
&= e^{-np} p \frac{(np)^{s-1}}{(s-1)!} \sum_{l=0}^{v-1} \binom{v-1}{l} (-x_j)^{(v-1)-l} \prod_{l'=0}^{l-1} \left( \frac{s-1}{n} - \frac{l'}{n} \right) \\
&= p e^{-np} \frac{(np)^{s-1}}{(s-1)!} h_{v-1,x_j}(s-1).
\end{aligned}$$

Substituting the last quantity into the previous recursive relation yields

$$H_{v,n}(s, p, j) = (p - x_j) H_{v-1,n}(s, p, j) + p e^{-np} \frac{(np)^{s-1}}{(s-1)!} h_{v-1,x_j}(s-1),$$

with a base case  $H_{0,n}(s, p, j) = 0$ . Therefore, the principle of mathematical induction implies

$$H_{v,n}(s, p, j) = p e^{-np} \frac{(np)^{s-1}}{(s-1)!} \sum_{l=0}^{v-1} (p - x_j)^{v-l-1} h_{l,x_j}(s-1). \quad \square$$

Without loss of generality, we assume that  $c \log n$  is a positive integer so that  $nx_j \in \mathbb{Z}^+$  for all  $j$ , since otherwise we can modify the value of  $c$  by at most 1 to fulfill this assumption. As an implication of Lemma 10, for integer  $s$  such that  $s/n$  or  $(s-1)/n$  is the end point of  $I_{j_p}^*$  (right end point if

$j_p \leq 2$ ), and sufficiently large constant  $c$  satisfying  $c \log n > d$ ,

$$\begin{aligned}
|H_{v,n}(s, p, j_p)| &= \left| pe^{-np} \frac{(np)^{s-1}}{(s-1)!} \sum_{l=0}^{v-1} (p - x_{j_p})^{v-l-1} h_{l, x_{j_p}}(s-1) \right| \\
&= \Pr(N_1 = s-1) \cdot p \left| \sum_{l=0}^{v-1} (p - x_{j_p})^{v-l-1} h_{l, x_{j_p}}(s-1) \right| \\
&\leq \frac{p}{n^5} \left| \sum_{l=0}^{v-1} (p - x_{j_p})^{v-l-1} h_{l, x_{j_p}}(s-1) \right| \\
&\leq \frac{p}{n^5} v \left( 2|I_{j_p}^{**}| \right)^{v-1},
\end{aligned}$$

where the second last step follows from the Chernoff bound and the last step follows from Lemma 8 by setting  $\delta = |I_{j_p}^{**}|$ . Under the same set of conditions, we can show that

$$|H_{v,n}(s, p, j_p - 1)| \leq \frac{p}{n^5} v \left( 2|I_{j_p}^{**}| \right)^{v-1}$$

and

$$|H_{v,n}(s, p, j_p + 1)| \leq \frac{p}{n^5} v \left( 2|I_{j_p}^{**}| \right)^{v-1}.$$

**Bounding the bias of  $\hat{g}^*$**  Now we are ready to analyze the quantity of interest:

$$\begin{aligned}
\left| \mathbb{E} \left[ \left( E_{\tilde{g}_{j_p}}(N_1) - \tilde{g}_{j_p}(p) \right) \mathbf{1}_{\frac{N_1}{n} \in I_{j_p}^*} \right] \right| &= \left| \sum_{v=0}^{d_n} a_{j_p v} |I_{j_p}^{**}|^{-v} \mathbb{E} \left[ \left( h_{v, x_{j_p}}(N_1) - (p - x_{j_p})^v \right) \mathbf{1}_{\frac{N_1}{n} \in I_{j_p}^*} \right] \right| \\
&= \left| \sum_{v=0}^{d_n} a_{j_p v} |I_{j_p}^{**}|^{-v} \mathbb{E} H_{v,n}(nx_{j_p+1}, nx_{j_p+4}, p, j_p) \right| \\
&= \left| \sum_{v=0}^{d_n} a_{j_p v} |I_{j_p}^{**}|^{-v} (H_{v,n}(nx_{j_p+1}, p, j) \mathbf{1}_{j_p > 2} - H_{v,n}(nx_{j_p+4} + 1, p, j)) \right| \\
&\leq \sum_{v=1}^{d_n} a_{j_p v} |I_{j_p}^{**}|^{-v} \frac{2p}{n^5} v \left( 2|I_{j_p}^{**}| \right)^{v-1} \\
&\leq \sum_{v=1}^{d_n} 2T \cdot 2^{3.5d_n} \left( \frac{1}{4c_n} \right) \frac{2p}{n^5} v (2)^{v-1} \\
&\leq \frac{Td_n \cdot 2^{4.5d_n}}{c_n n^5} \cdot p.
\end{aligned}$$

The same reasoning also shows that

$$\left| \mathbb{E} \left[ \left( E_{\tilde{g}_{j_p-1}}(N_1) - \tilde{g}_{j_p-1}(p) \right) \mathbf{1}_{\frac{N_1}{n} \in I_{j_p}^*} \right] \right| \leq \frac{Td_n \cdot 2^{4.5d_n}}{c_n n^5} \cdot p$$

and

$$\left| \mathbb{E} \left[ \left( E_{\tilde{g}_{j_p+1}}(N_1) - \tilde{g}_{j_p+1}(p) \right) \mathbf{1}_{\frac{N_1}{n} \in I_{j_p}^*} \right] \right| \leq \frac{Td_n \cdot 2^{4.5d_n}}{c_n n^5} \cdot p.$$

Consolidating all the previous results yields the desired bias bound:

$$\begin{aligned}
|\mathbb{E}[\hat{g}^*(N_1, N'_1)] - g(p)| &\leq \frac{T}{n^5} \cdot p + \frac{3Td_n \cdot 2^{4.5d_n}}{c_n n^5} \cdot p + \frac{5}{n} D_g^*(2n, p) \\
&\leq \frac{p}{n^{5-\lambda}} + \frac{5}{n} D_g^*(2n, p).
\end{aligned}$$



#### 1.4 Bounding the variance of $\hat{g}^*$

In this section, we establish the following bound on the variance of our estimator.

**Lemma 11.** *For sufficiently large  $c$ ,*

$$\text{Var}(\hat{g}^*(N_1, N'_1)) \leq \frac{72c(\log n)}{n^{1-3\lambda}} (L_g^*(2n, p))^2 \cdot p + \frac{8T^2}{n^5} \cdot p.$$

*Proof.* Since  $\text{Var}(X) \leq \mathbb{E}[X^2]$  and  $\mathbb{1}_X \cdot \mathbb{1}_{\bar{X}} = 0$  for any random variable  $X$ , we have

$$\begin{aligned} \text{Var}(\hat{g}^*(N_1, N'_1)) &\leq \mathbb{E} \left( \hat{g}^*(N_1, N'_1) \mathbb{1}_{\frac{N_1}{n} \in I_{j_p}^*} \mathbb{1}_{\frac{N'_1}{n} \in I_{j_p}^*} \right)^2 \\ &\quad + \mathbb{E} \left( \hat{g}^*(N_1, N'_1) \left( 1 - \mathbb{1}_{\frac{N_1}{n} \in I_{j_p}^*} \mathbb{1}_{\frac{N'_1}{n} \in I_{j_p}^*} \right) \right)^2 \\ &\leq \sum_{j' \in [j_p-1, j_p+1]} \mathbb{E} \left( \hat{g}^*(N_1, N'_1) \mathbb{1}_{\frac{N_1}{n} \in I_{j_p}^*} \mathbb{1}_{\frac{N'_1}{n} \in I_{j'}^*} \right)^2 \\ &\quad + 4T^2 \cdot \Pr \left( \frac{N_1}{n} \notin I_{j_p}^* \text{ or } \frac{N'_1}{n} \notin I_{j_p}^* \right). \\ &\leq \sum_{j' \in [j_p-1, j_p+1]} \mathbb{E}[E_{\hat{g}_{j'}}^2(N_1)] + 8T^2 \cdot \Pr \left( \frac{N_1}{n} \notin I_{j_p}^* \right). \end{aligned}$$

For sufficiently large  $c$ , the second term is at most  $8T^2 p/n^5$  by the Chernoff bound. It remains to analyze  $\mathbb{E}[E_{\hat{g}_j}^2(N_1)]$  for  $j \in [j_p-1, j_p+1]$ . By the Cauchy-Schwarz inequality,

$$\begin{aligned} \mathbb{E}[E_{\hat{g}_j}^2(N_1)] &= \mathbb{E} \left( \sum_{v=0}^{d_n} a_{jv} |I_j^{**}|^{-v} h_{v, x_j}(N_1) \right)^2 \\ &\leq \left( \sum_{v=0}^{d_n} |a_{jv}| |I_j^{**}|^{-v} \left( \mathbb{E}[h_{v, x_j}^2(N_1)] \right)^{\frac{1}{2}} \right)^2. \end{aligned}$$

Consider the inner expectation. If  $j_{p_i} \leq 2$  and  $j \in [j_{p_i}-1, j_{p_i}+1]$ , then  $x_j = 0$ . By Lemma 6,

$$\mathbb{E}[h_{v, x_j}^2(N_1)] \leq \frac{2(32c \log n)^{2v-1} p}{n^{2v-1}}.$$

This together with Lemma 4 and the definition of  $L_g^*(n, p)$  implies that

$$\begin{aligned} \mathbb{E}[E_{\hat{g}_j}^2(N_1)] &\leq \left( \sum_{v=0}^{d_n} |a_{jv}| |I_j^{**}|^{-v} \left( \mathbb{E}[h_{v, x_j}^2(N_1)] \right)^{\frac{1}{2}} \right)^2 \\ &\leq \left( \sum_{v=0}^{d_n} (2^{3.5d_n+1} L_g^*(2n, p) |I_j^{**}|) |I_j^{**}|^{-v} \left( \frac{32c \log n}{n} \right)^{v-1} \sqrt{\frac{64c(\log n)p}{n}} \right)^2 \\ &\leq (d_n 2^{5.5d_n+1} L_g^*(2n, p))^2 \frac{64c(\log n)p}{n}. \end{aligned}$$

If  $j_p > 2$  and  $j \in [j_p-1, j_p+1]$ , then by Lemma 7,

$$\mathbb{E}[h_{v, x_j}^2(N_1)] \leq \left( \frac{72c(\log n)p}{n} \right)^v \leq \left( \frac{72c^2(\log n)^2 j_p^2}{n^2} \right)^{v-1} \left( \frac{72c(\log n)p}{n} \right).$$

Analogously,

$$\begin{aligned} \mathbb{E}[E_{\hat{g}_j}^2(N_1)] &\leq \left( \sum_{v=0}^{d_n} |a_{jv}| |I_j^{**}|^{-v} \left( \mathbb{E}[h_{v, x_j}^2(N_1)] \right)^{\frac{1}{2}} \right)^2 \\ &\leq \left( \sum_{v=0}^{d_n} (2^{3.5d_n+1} L_g^*(2n, p) |I_j^{**}|) |I_j^{**}|^{-v} \left( \frac{3 \cdot 2^{1.5} c(\log n) j_p}{n} \right)^{v-1} \sqrt{\frac{72c(\log n)p}{n}} \right)^2 \\ &\leq (d_n 2^{4.5d_n+1} L_g^*(2n, p))^2 \frac{72c(\log n)p}{n}. \end{aligned}$$

Consolidating the above results yields the desired bound.  $\square$

## 1.5 Sensitivity bound

Incorporate our sampling scheme, we define the *sensitivity* of an estimator  $\hat{g}$  as the maximum possible change in its value when an input sequence is replaced by another that differs in exactly one location,

$$S(\hat{g}) := \max \left\{ \left| \hat{g}(x^m) - \hat{g}(y^{m'}) \right| : m, m' \in \mathbb{Z}, x^m \text{ and } y^{m'} \text{ differ in one location} \right\}.$$

By construction, sensitivity upper bounds  $n$ -sensitivity, i.e.,  $S(\hat{g}) \geq S(\hat{g}, n)$  for all  $n$ . Due to sample splitting, replacing the given sample sequence  $X^N$  by a sequence that differs in at most one location could change  $N_1$ ,  $N'_1$ , or both, by at most one. In other words, to bound the sensitivity of  $\hat{g}^*$ , we need to bound the change in the estimator's value when we modify  $N_1$  or  $N'_1$  by one. We proceed as follows. If the value of  $N_1$  increases or decreases by one, we need to consider the following two types of differences:

$$\mathbb{D}_g^{(1)}(n, j, s) := E_{\tilde{g}_j}(s) - E_{\tilde{g}_j}(s-1),$$

for  $s$  satisfying  $s-1, s$ , or  $s+1 \in nI_j^{**}$ , and

$$\mathbb{D}_g^{(2)}(n, j, s) := E_{\tilde{g}_j}(s) - E_{\tilde{g}_{j-1}}(s-1),$$

for  $s$  satisfying  $s \in nI_{j-1}^{**} \cap nI_j^{**}$ . If the value of  $N'_1$  increases or decreases by one, we need to consider the difference:

$$\mathbb{D}_g^{(3)}(n, j, s) := E_{\tilde{g}_j}(s) - E_{\tilde{g}_{j-1}}(s),$$

for  $s$  satisfying  $s \in nI_{j-1}^{**} \cap nI_j^{**}$ . The triangle inequality relates this quantity to the previous two and yields

$$\begin{aligned} \left| \mathbb{D}_g^{(3)}(n, j, s) \right| &= \left| E_{\tilde{g}_j}(s) - E_{\tilde{g}_{j-1}}(s-1) \right| \\ &\leq \left| E_{\tilde{g}_j}(s) - E_{\tilde{g}_j}(s-1) \right| + \left| E_{\tilde{g}_j}(s-1) - E_{\tilde{g}_{j-1}}(s-1) \right| \\ &= \left| \mathbb{D}_g^{(1)}(n, j, s) \right| + \left| \mathbb{D}_g^{(2)}(n, j, s-1) \right|. \end{aligned}$$

Hence to bound  $S(\hat{g})$ , we only need to derive upper bounds for  $|\mathbb{D}_g^{(1)}|$  and  $|\mathbb{D}_g^{(2)}|$ , which we refer to as the *type-1* and *type-2 differences*, respectively. In Section 1.5.2 and 1.5.3, we show that both quantities are at most  $S_g^*(2n)/n^{1-\lambda}$ . Given this, and a Poisson-sampling McDiarmid's inequality derived in the next section, we establish the third inequality in Theorem 4.

### 1.5.1 From bounded difference to concentration

In this section, we establish a McDiarmid's inequality for Poisson sampling, showing that small sensitivity still implies strong concentration under formulation. We believe that this result is of independent interest. Specifically, we show that for any  $p \in \Delta_k$ ,  $N \sim \text{Poi}(n)$ ,  $X^N \sim p$ ,

**Lemma 12.** *For any error parameter  $\varepsilon \in (0, 1)$  and estimator  $\hat{f}$  satisfying  $S(\hat{f}) \geq 1/n$ ,*

$$\Pr \left( \left| \hat{f}(X^N) - \mathbb{E} [\hat{f}(X^N)] \right| > \varepsilon \right) \leq 4 \exp \left( -\frac{\varepsilon^2}{2n(4S(\hat{f}))^2} \right).$$

*Proof.* By the linearity of expectation and triangle inequality,

$$|\mathbb{E}[\hat{f}(X^m)] - \mathbb{E}[\hat{f}(X^{m+1})]| \leq S(\hat{f}), \forall m.$$

Therefore for any  $m$ ,

$$\begin{aligned} |\mathbb{E}[\hat{f}(X^m)] - \mathbb{E}[\hat{f}(X^N)]| &= \left| \sum_{t=0}^{\infty} \mathbb{E}[\hat{f}(X^t)] \cdot \Pr(N=t) - \mathbb{E}[\hat{f}(X^m)] \right| \\ &= \left| \sum_{t=0}^{\infty} (\mathbb{E}[\hat{f}(X^t)] - \mathbb{E}[\hat{f}(X^m)]) \cdot \Pr(N=t) \right| \\ &\leq S(\hat{f}) \sum_{t=0}^{\infty} |t-m| \cdot \Pr(N=t). \end{aligned}$$

We consider the last summation and simplify it as follows:

$$\begin{aligned}
& \sum_{t=0}^{\infty} |t - m| \cdot \Pr(N = t) \\
&= \sum_{t=0}^m (m - t) \Pr(N = t) + \sum_{t=m}^{\infty} (t - m) \Pr(N = t) \\
&= m \Pr(N \leq m) - \sum_{t=0}^m t \exp(-n) \frac{n^t}{t!} + \sum_{t=m}^{\infty} t \exp(-n) \frac{n^t}{t!} - m \Pr(N \geq m) \\
&= m \Pr(N \leq m) - n \Pr(N \leq m - 1) + n \Pr(N \geq m - 1) - m \Pr(N \geq m) \\
&= (m - n)(\Pr(N \leq m) - \Pr(N \geq m)) + n(\Pr(N = m) + \Pr(N = m - 1)).
\end{aligned}$$

Note that the second quantity on the right-hand side satisfies

$$\begin{aligned}
\Pr(N = m) + \Pr(N = m - 1) &\leq \Pr(N = n) + \Pr(N = n - 1) \\
&\leq 2 \exp(-n) \frac{n^n}{n!} \\
&\leq \frac{1}{\sqrt{n}}.
\end{aligned}$$

Consequently we have

$$\begin{aligned}
|\mathbb{E}[\hat{f}(X^m)] - \mathbb{E}[\hat{f}(X^N)]| &\leq S(\hat{f}) \sum_{t=0}^{\infty} |t - m| \cdot \Pr(N = t) \\
&\leq S(\hat{f}) ((m - n)(\Pr(N \leq m) - \Pr(N \geq m)) + \sqrt{n}) \\
&\leq S(\hat{f}) \cdot (|m - n| + \sqrt{n}).
\end{aligned}$$

Next, let  $\varepsilon' \in (0, 1)$  be a constant to be determined later. The probability of interest satisfies

$$\begin{aligned}
& \Pr\left(\left|\hat{f}(X^N) - \mathbb{E}[\hat{f}(X^N)]\right| > \varepsilon\right) \\
&= \sum_{m=0}^{\infty} \Pr\left(\left|\hat{f}(X^m) - \mathbb{E}[\hat{f}(X^N)]\right| > \varepsilon\right) \Pr(N = m) \\
&\leq \Pr(N \notin n[1 - \varepsilon', 1 + \varepsilon']) + \sum_{m \in n[1 - \varepsilon', 1 + \varepsilon']} \Pr\left(\left|\hat{f}(X^m) - \mathbb{E}[\hat{f}(X^N)]\right| > \varepsilon\right) \Pr(N = m).
\end{aligned}$$

We can easily bound the first term through the Chernoff bound. For the second term,

$$\begin{aligned}
& \sum_{m \in n[1 - \varepsilon', 1 + \varepsilon']} \Pr\left(\left|\hat{f}(X^m) - \mathbb{E}[\hat{f}(X^m)]\right| > \varepsilon - \left|\mathbb{E}[\hat{f}(X^m)] - \mathbb{E}[\hat{f}(X^N)]\right|\right) \Pr(N = m) \\
&\leq \sum_{m \in n[1 - \varepsilon', 1 + \varepsilon']} \Pr\left(\left|\hat{f}^*(X^m) - \mathbb{E}[\hat{f}^*(X^m)]\right| > \varepsilon - S(\hat{f})(n\varepsilon' + \sqrt{n})\right) \Pr(N = m) \\
&\leq 2 \exp\left(-\frac{(\varepsilon - S(\hat{f})(n\varepsilon' + \sqrt{n}))^2}{n(1 + \varepsilon')(S(\hat{f}))^2}\right),
\end{aligned}$$

where the last step follows from the McDiarmid's inequality. Next, setting

$$\varepsilon' = \frac{\varepsilon}{2nS(\hat{f})} \in \left(0, \frac{1}{2}\right),$$

we can rewrite last term, with the multiplicative factor of 2 removed, as

$$\exp\left(-\frac{(\varepsilon - S(\hat{f})(n\varepsilon' + \sqrt{n}))^2}{n(1 + \varepsilon')(S(\hat{f}))^2}\right) = \exp\left(-\frac{(\frac{\varepsilon}{2} - \sqrt{n}S(\hat{f}))^2}{n(1 + \varepsilon')(S(\hat{f}))^2}\right).$$

Hence, it suffices to obtain tight upper bounds on the right-hand side quantity, for which we consider the following two cases. If the parameter  $\varepsilon$  is relatively large such that

$$\varepsilon \geq 4\sqrt{n}S(\hat{f}),$$

the quantity of interest is at most

$$\exp\left(-\frac{(\frac{\varepsilon}{2} - \sqrt{n}S(\hat{f}))^2}{n(1 + \varepsilon')(S(\hat{f}))^2}\right) \leq \exp\left(-\frac{\varepsilon^2}{32n(S(\hat{f}))^2}\right).$$

Otherwise, we have  $\varepsilon^2/(32(S(\hat{f}))^2) \leq 1/2$ , implying

$$2 \exp\left(-\frac{\varepsilon^2}{32n(S(\hat{f}))^2}\right) \geq 2 \exp\left(-\frac{1}{2}\right) > 1.$$

Consolidating previous results, we get

$$\begin{aligned} & \Pr\left(\left|\hat{f}^*(X^{N''}) - \mathbb{E}\left[\hat{f}^*(X^{N''})\right]\right| > \varepsilon\right) \\ & \leq 2 \exp\left(-\frac{\varepsilon^2}{32n(S(\hat{f}))^2}\right) + \Pr(N'' \notin n[1 - \varepsilon', 1 + \varepsilon']) \\ & \leq 2 \exp\left(-\frac{\varepsilon^2}{32n(S(\hat{f}))^2}\right) + 2 \exp\left(-\frac{1}{3}n\varepsilon'^2\right) \\ & \leq 2 \exp\left(-\frac{\varepsilon^2}{32n(S(\hat{f}))^2}\right) + 2 \exp\left(-\frac{\varepsilon^2}{12n(S(\hat{f}))^2}\right) \\ & \leq 4 \exp\left(-\frac{\varepsilon^2}{32n(S(\hat{f}))^2}\right). \end{aligned}$$

□

### 1.5.2 Bounding the type-1 difference

The following lemma provides tight upper bound on the type-1 difference.

**Lemma 13.** For  $s$  satisfying  $s - 1, s$ , or  $s + 1 \in nI_j^{**}$ ,

$$|E_{\hat{g}_j}(s) - E_{\hat{g}_j}(s - 1)| \leq \frac{d_n \cdot 2^{4.5d_n+1}}{n} L_g^*(2n).$$

*Proof.* Recall that

$$h_{v,x_j}(s) = \sum_{l=0}^v \binom{v}{l} (-x_j)^{v-l} \prod_{l'=0}^{l-1} \left(\frac{s}{n} - \frac{l'}{n}\right).$$

The difference between  $h_{v,x_j}(s)$  and  $h_{v,x_j}(s - 1)$  is

$$\begin{aligned} h_{v,x_j}(s) - h_{v,x_j}(s - 1) &= \sum_{l=0}^v \binom{v}{l} (-x_j)^{v-l} \left( \prod_{l'=0}^{l-1} \left(\frac{s}{n} - \frac{l'}{n}\right) - \prod_{l'=0}^{l-1} \left(\frac{s-1}{n} - \frac{l'}{n}\right) \right) \\ &= \sum_{l=0}^v \binom{v}{l} (-x_j)^{v-l} \left( \prod_{l'=0}^{l-1} \left(\frac{s}{n} - \frac{l'}{n}\right) - \prod_{l'=1}^l \left(\frac{s}{n} - \frac{l'}{n}\right) \right) \\ &= \sum_{l=0}^v \binom{v}{l} (-x_j)^{v-l} \left( \frac{s}{n} \prod_{l'=1}^{l-1} \left(\frac{s}{n} - \frac{l'}{n}\right) - \frac{s-l}{n} \prod_{l'=1}^{l-1} \left(\frac{s}{n} - \frac{l'}{n}\right) \right) \\ &= \sum_{l=0}^v \frac{l}{n} \binom{v}{l} (-x_j)^{v-l} \prod_{l'=1}^{l-1} \left(\frac{s}{n} - \frac{l'}{n}\right) \\ &= \frac{v}{n} \sum_{l=0}^{v-1} \binom{v-1}{l} (-x_j)^{(v-1)-l} \prod_{l'=0}^{l-1} \left(\frac{s-1}{n} - \frac{l'}{n}\right) \\ &= \frac{v}{n} h_{v-1,x_j}(s - 1). \end{aligned}$$

By Lemma 4 and the definition of  $L_g^*(2n)$ ,

$$|a_{jv}| \leq 2^{3.5d_n} \cdot 2 \cdot \sup_{z_1, z_2 \in I_j^{**}} |g(z_1) - g(z_2)| \leq 2^{3.5d_n+1} L_g^*(2n) |I_j^{**}|.$$

Therefore, the quantity of interest satisfies

$$\begin{aligned} |E_{\tilde{g}_j}(s) - E_{\tilde{g}_j}(s-1)| &= \left| \sum_{v=0}^{d_n} a_{jv} |I_j^{**}|^{-v} (h_{v,x_j}(s) - h_{v,x_j}(s-1)) \right| \\ &= \left| \sum_{v=0}^{d_n} a_{jv} |I_j^{**}|^{-v} \frac{v}{n} h_{v-1,x_j}(s-1) \right| \\ &\leq \frac{2^{3.5d_n+1}}{n} L_g^*(2n) |I_j^{**}| \sum_{v=1}^{d_n} v |I_j^{**}|^{-v} (2|I_j^{**}|)^{v-1} \\ &\leq \frac{2^{3.5d_n+1}}{n} L_g^*(2n) \sum_{v=1}^{d_n} v 2^{v-1} \\ &\leq \frac{d_n \cdot 2^{4.5d_n+1}}{n} L_g^*(2n), \end{aligned}$$

where the third last inequality follows from Lemma 8 by setting  $\delta = |I_j^{**}|$ , and the last inequality follows from  $\sum_{v=1}^{d_n} v 2^{v-1} \leq d_n \cdot 2^{d_n}$ .  $\square$

### 1.5.3 Bounding the type-2 difference

In this section, we show the following upper bound on the type-2 difference.

**Lemma 14.** *For  $s$  satisfying  $s \in nI_{j-1}^{**} \cap nI_j^{**}$ ,*

$$|E_{\tilde{g}_{j-1}}(s) - E_{\tilde{g}_j}(s)| \leq \frac{4 \cdot 2^{4.5d_n}}{n} D_g^*(2n).$$

*Proof.* Note that  $E_{\tilde{g}_{j-1}}(N_i) - E_{\tilde{g}_j}(N_i)$  is an unbiased estimator of  $(\tilde{g}_{j-1} - \tilde{g}_j)(x)$ . For simplicity, denote  $\tilde{q}_j(x) := (\tilde{g}_{j-1} - \tilde{g}_j)(x)$  and  $I_j^\Lambda := I_{j-1}^{**} \cap I_j^{**} = c_n [(j-3)^2 \mathbf{1}_{j \geq 3}, (j+1)^2]$ . Then we have  $|\tilde{q}_j(x)| \leq 2D_g^*(2n)/n$  for  $x \in I_j^\Lambda$ . Let

$$x'_j := c_n(j-3)^2 \mathbf{1}_{j \geq 3}$$

be the left end point of  $I_j^\Lambda$ , and

$$|I_j^\Lambda| := c_n(j+1)^2 - c_n(j-3)^2 \mathbf{1}_{j \geq 3}$$

be the length of  $I_j^\Lambda$ . For any  $x \in I_j^\Lambda$ , there exists  $y_x \in [0, 1]$  such that

$$x = x'_j + |I_j^\Lambda| y_x.$$

Since  $x \rightarrow y_x$  is a linear transformation, there exist coefficients  $b_{jv}, v = 0, \dots, d_n$ , independent of  $x$ , such that

$$\tilde{q}_j(x) = \sum_{v=0}^{d_n} b_{jv} y_x^v.$$

By the definition of  $\tilde{q}_j(x)$  and the triangle inequality, we can deduce that  $|\tilde{q}_j(x)| \leq 2D_g^*(2n)/n$  for all  $x \in I_j^\Lambda$ . Furthermore, according to Lemma 4,

$$|b_{jv}| \leq \frac{2^{4.5d_n}}{n} D_g^*(2n).$$

Substituting  $y_x$  by  $|I_j^\Lambda|^{-1}(x - x'_j)$ , we can re-write  $\tilde{q}_j(x)$  as

$$\tilde{q}_j(x) = \sum_{v=0}^{d_n} b_{jv} |I_j^\Lambda|^{-v} (x - x'_j)^v.$$

Consequently, we have the following equality:

$$(E_{\tilde{g}_{j-1}} - E_{\tilde{g}_j})(s) = \sum_{v=0}^{d_n} b_{jv} |I_j^\Lambda|^{-v} h_{v,x'_j}(s).$$

Therefore, for all  $s \in nI_j^\Lambda$ ,

$$\begin{aligned} |(E_{\tilde{g}_{j-1}} - E_{\tilde{g}_j})(s)| &= \left| \sum_{v=0}^{d_n} b_{jv} |I_j^\Lambda|^{-v} h_{v,x'_j}(s) \right| \\ &\leq \sum_{v=0}^{d_n} \frac{2 \cdot 2^{3.5d_n} D_g^*(2n)}{n} |I_j^\Lambda|^{-v} (2|I_j^\Lambda|)^v \\ &\leq \frac{2^{3.5d_n} D_g^*(2n)}{n} \sum_{v=0}^{d_n} 2^{v+1} \\ &\leq \frac{4 \cdot 2^{4.5d_n}}{n} D_g^*(2n). \end{aligned} \quad \square$$

## 2 Proofs of other theorems

### 2.1 Proof of Theorem 5

Let  $\vec{p} \in \Delta_k$  be an arbitrary distribution and  $X^N$  be an i.i.d. sample sequence from  $\vec{p}$  of an independent  $N \sim \text{Poi}(2n)$  size. Applying sample splitting to  $X^N$ , we denote by  $N_i$  and  $N'_i$  the number of times symbol  $i \in [k]$  appearing in the first and second sub-sample sequences, respectively. Applying the technique presented in Section 1.2, we can estimate the additive property

$$f(\vec{p}) = \sum_{i \in [k]} f_i(p_i)$$

by the estimator

$$\hat{f}^*(X^N) := \sum_{i \in [k]} \hat{f}_i^*(N_i, N'_i).$$

We start by bounding the bias of  $\hat{f}^*$ . Fix  $\lambda \in (0, 1/4)$  and let  $T$  be a sufficiently large constant satisfying  $T_1 \gg \max_{i \in [k]} \max_{x \in [0,1]} |f_i(x)|$ . The results in Section 1.3 and triangle inequality imply

$$\begin{aligned} |\mathbb{E}[\hat{f}^*(X^N)] - f(\vec{p})| &= \left| \mathbb{E} \left[ \sum_{i \in [k]} \hat{f}_i^*(N_i, N'_i) \right] - \sum_{i \in [k]} f_i(p_i) \right| \leq \sum_{i \in [k]} |\mathbb{E}[\hat{f}_i^*(N_i, N'_i)] - f_i(p_i)| \\ &\leq \sum_{i \in [k]} \left( \frac{T}{n^5} \cdot p_i + \frac{3Td_n \cdot 2^{4.5d_n}}{c_n n^5} \cdot p_i + \frac{5}{n} D_{f_i}^*(2n, p_i) \right) \\ &= \frac{T}{n^5} + \frac{3Td_n \cdot 2^{4.5d_n}}{c_n n^5} + \frac{5}{n} \sum_{i \in [k]} D_{f_i}^*(2n, p_i) \\ &\leq \frac{T}{n^5} + \frac{Tn^\lambda}{cn^4 \log n} + \frac{5}{n} \sum_{i \in [k]} D_{f_i}^*(2n, p_i). \end{aligned}$$

Next we analyze the variance of  $\hat{f}^*$ . Due to Poisson sampling and sample splitting, all the counts  $N_i$  and  $N'_i$ ,  $i \in [k]$  are mutually independent. Therefore, by Lemma 11 in Section 1.4,

$$\begin{aligned} \text{Var}(\hat{f}^*(X^N)) &= \text{Var} \left( \sum_{i \in [k]} \hat{f}_i^*(N_i, N'_i) \right) = \sum_{i \in [k]} \text{Var}(\hat{f}_i^*(N_i, N'_i)) \\ &\leq \sum_{i \in [k]} \left( \frac{72c(\log n)}{n^{1-3\lambda}} (L_{f_i}^*(2n, p_i))^2 \cdot p_i + \frac{8T^2}{n^5} \cdot p_i \right) \\ &= \frac{8T^2}{n^5} + \frac{72c(\log n)}{n^{1-3\lambda}} \sum_{i \in [k]} (L_{f_i}^*(2n, p_i))^2 \cdot p_i. \end{aligned}$$

To characterize higher-order central moments of  $\hat{f}^*$ , note that changing one sample point in  $X^N$  would change the counts  $N_i, N'_i$ , or both for at most two symbols. Hence, according to Section 1.5, for a given  $n$  the sensitivity of  $\hat{f}^*$ , also defined in the same section, satisfies

$$S(\hat{f}^*) \leq \frac{4 \max_{i \in [k]} S_{f_i}^*(2n)}{n^{1-\lambda}}.$$

This bound together with Lemma 12 yields

$$\Pr \left( \left| \hat{f}^*(X^N) - \mathbb{E} \left[ \hat{f}^*(X^N) \right] \right| > \varepsilon \right) \leq 4 \exp \left( - \frac{n^{1-2\lambda} \varepsilon^2}{(32 \max_{i \in [k]} S_{f_i}^*(2n))^2} \right).$$

## 2.2 Proof of Theorem 1

Recall that an additive property  $f$  is a Lipschitz property if all the  $f_i$ 's have uniformly bounded Lipschitz constants. Our proof of Theorem 1 relies on the following lemma, which corresponds to Theorem 7.2 in [3] whose proof is completely constructive. In other words, there is an explicit procedure to compute the polynomial described in the following lemma.

**Lemma 15.** *There exists a universal constant  $C$  such that for any degree parameter  $d \in \mathbb{Z}$  and 1-Lipschitz function  $g$  over an arbitrary bounded interval  $I := [x_1, x_2]$ , one can find a polynomial  $\tilde{g}$  of degree at most  $d$  satisfying*

$$|\tilde{g}(x) - g(x)| \leq \frac{C \sqrt{|I|(x - x_1)}}{d}, \forall x \in I.$$

We restate Theorem 1 below under Poisson sampling. By the results in [9], this suffices to imply the corresponding result under fixed sampling, where the sample size is fixed to be  $n$ .

**Theorem 1.** *If  $f$  is an  $L$ -Lipschitz property, then for any  $\vec{p} \in \Delta_k$ ,  $N \sim \text{Poi}(n)$ , and  $X^N \sim \vec{p}$ ,*

$$\left| \mathbb{E} \left[ \hat{f}^*(X^N) \right] - f(\vec{p}) \right| \lesssim \sum_{i \in [k]} L \sqrt{\frac{p_i}{n \log n}} \leq L \sqrt{\frac{k}{n \log n}},$$

and

$$\text{Var}(\hat{f}^*(X^N)) \leq \frac{L^2}{n^{1-4\lambda}}.$$

*Proof.* Without loss of generality, we assume that all the  $f_i$ 's have Lipschitz constants uniformly bounded by 1. The derivations in Section 1.3 and 2.1 imply

$$\left| \mathbb{E}[\hat{f}^*(X^N)] - f(\vec{p}) \right| \lesssim \frac{1}{n^3} + \sum_{i \in [k]} \max_{j' \in [j_{p_i}-1, j_{p_i}+1]} |\tilde{f}_{i,j'}(p_i) - f(p_i)|,$$

Here, for  $j' > 3$ , we choose  $\tilde{f}_{i,j'}(x)$  to be the min-max polynomial defined in Section 1.2; for  $j' \leq 3$ , we employ the polynomials used in Lemma 15 instead. Note that the latter polynomials may not be the min-max polynomials. However, this would not affect our analysis as our proof in Section 1 also holds for these polynomials (simply change the definition of  $D_g^*(2n, p)$ ).

For any symbol  $i$  satisfying  $j_{p_i} \leq 3$ ,

$$\max_{j' \in [j_{p_i}-1, j_{p_i}+1]} |\tilde{f}_{i,j'}(p_i) - f_i(p_i)| \lesssim \max_{j' \in [j_{p_i}-1, j_{p_i}+1]} \frac{\sqrt{|I_{j'}|(p_i - 0)}}{d_n} \asymp \frac{\sqrt{\frac{\log n}{n} p_i}}{\log n} = \sqrt{\frac{p_i}{n \log n}}.$$

On the other hand, applying Lemma 15 and the definition of min-max polynomials to our case implies that for any symbol  $i$  satisfying  $j_{p_i} > 3$ ,

$$\max_{j' \in [j_{p_i}-1, j_{p_i}+1]} |\tilde{f}_{i,j'}(p_i) - f_i(p_i)| \lesssim \max_{j' \in [j_{p_i}-1, j_{p_i}+1]} \frac{|I_{j'}|}{d_n} \asymp \frac{j_{p_i}}{n}$$

and

$$p_i \in I_{p_i}^{**} = c \frac{\log n}{n} [(j_{p_i} - 3)^2, (j_{p_i} + 2)^2],$$

or equivalently,

$$j_{p_i} \in \left[ \sqrt{\frac{np_i}{c \log n}} - 2, \sqrt{\frac{np_i}{c \log n}} + 3 \right] \subseteq \left[ \sqrt{\frac{np_i}{c \log n}} - 2, 4\sqrt{\frac{np_i}{c \log n}} \right].$$

Therefore,

$$\max_{j' \in [j_{p_i}-1, j_{p_i}+1]} |\tilde{f}_{i,j'}(p_i) - f_i(p_i)| \lesssim \frac{j_{p_i}}{n} \leq \frac{1}{n} \cdot 4\sqrt{\frac{np_i}{c \log n}} \lesssim \sqrt{\frac{p_i}{n \log n}}.$$

The above result together with the Cauchy-Schwarz inequality implies

$$\left| \mathbb{E}[\hat{f}^*(X^N)] - f(\vec{p}) \right| \lesssim \frac{1}{n^3} + \sum_{i \in [k]} \sqrt{\frac{p_i}{n \log n}} \leq 2 \sum_{i \in [k]} \sqrt{\frac{p_i}{n \log n}} \leq 2\sqrt{\frac{k}{n \log n}},$$

where the second inequality follows by observing  $\sqrt{a+b} \leq \sqrt{a} + \sqrt{b}$ . Analogously, by previous results, we can bound the variance of  $\hat{f}^*$  as follows,

$$\text{Var}(\hat{f}^*(X^N)) \lesssim \frac{1}{n^5} + \frac{\log n}{n^{1-3\lambda}} \sum_{i \in [k]} (L_{f_i}^*(2n, p_i))^2 \cdot p_i.$$

By the definition of  $L_{f_i}^*$  and the assumption that  $f_i$  is 1-Lipschitz,

$$L_{f_i}^*(2n, p_i) = \max_{j' \in [j_{p_i}-1, j_{p_i}+1]} \left\{ \sup_{x, y \in I_{j'}^*, |y-x| \geq 1/n} \frac{|f_i(y) - f_i(x)|}{|y-x|} \right\} \leq 1.$$

Hence,

$$\text{Var}(\hat{f}^*(X^N)) \lesssim \frac{1}{n^5} + \frac{\log n}{n^{1-3\lambda}} \sum_{i \in [k]} p_i \leq \frac{1}{n^5} + \frac{\log n}{n^{1-3\lambda}} \leq \frac{1}{n^{1-4\lambda}}. \quad \square$$

### 2.3 Private property estimation

According to [1], we can construct a differentially private property estimator  $\hat{f}_{DP}^*$  by first applying  $\hat{f}^*$  to the sample sequence, and then privatizing its estimate through adding Laplace noise. The following lemma characterizes the sample complexity of  $\hat{f}_{DP}^*$ , and enables us to upper bound the private sample complexity of estimating general additive properties.

**Lemma 2.** *There exists a universal constant  $c^*$  such that*

$$C_f(\hat{f}_{DP}^*, 2\varepsilon, 1/3, 2\alpha) \leq \frac{c^*}{4} \left\{ C_f(\hat{f}^*, \varepsilon, 1/3) + \min \left\{ n : S(\hat{f}^*, n) \leq \varepsilon \alpha \right\} \right\}.$$

*The right-hand side also upper bounds  $C_f(2\varepsilon, 1/3, 2\alpha)$ .*

By Theorem 5 in the main paper, for  $\hat{f}^*(X^n)$  to achieve an accuracy of  $\varepsilon$  with probability at least  $2/3$ , for all  $\vec{p} \in \Delta_k$ , it suffices for the sampling parameter  $n$  to satisfy the following three conditions:

$$n \geq \left( \frac{4T}{\varepsilon} \right)^{\frac{1}{3}}, \quad \frac{n}{D_{f_i}^*(n)} \geq \frac{20k}{\varepsilon}, \quad \text{and} \quad \frac{n^{\frac{1}{2}-\lambda}}{S_{f_i}^*(n)} \geq \frac{16\sqrt{\log 12}}{\varepsilon}, \quad \forall i.$$

where  $T$  is a uniform upper bound on  $|f_i(x)|, \forall i \in [k], x \in [0, 1]$ . To further make the estimator's  $n$ -sensitivity smaller than  $\alpha\varepsilon$ , the sampling parameter  $n$  should also satisfy the condition:

$$\frac{n^{1-\lambda}}{S_{f_i}^*(n)} \geq \frac{1}{\alpha\varepsilon}, \quad \forall i.$$

Define  $n_f(2\varepsilon, 2\alpha)$  as the smallest  $n$  satisfying all the four inequalities above. Then,

**Theorem 6.** *The  $(\varepsilon, 1/3, \alpha)$ -private sample complexity for any additive property  $f$  satisfies*

$$C_f(\varepsilon, 1/3, \alpha) \leq n_f(\varepsilon, \alpha).$$



## 2.4 High-probability property estimation

In this section, we present tight upper and lower bounds on the  $(\varepsilon, \delta)$ -sample complexity of estimating various properties. The error parameter  $\varepsilon$  can take any value in  $(0, 1)$ . All the upper bounds follow from Theorem 5 in the main paper. Below we focus on deriving the lower bounds.

### Shannon entropy

For any absolute constant  $\beta \in (0, 1)$ ,

$$\frac{k}{\varepsilon \log k} + \log \frac{1}{\delta} \cdot \frac{\log^2 k}{\varepsilon^2} \lesssim C_f(\varepsilon, \delta).$$

The first part of the lower bound follows directly from [9]. To show the second part of the lower bound, let  $\varepsilon' \in (0, 1)$  be a parameter to be determined later, and consider the following [9] two distributions in  $\Delta_k$ ,

$$\vec{p}_1 := \left( \frac{1 - \varepsilon'}{3(k-1)}, \dots, \frac{1 - \varepsilon'}{3(k-1)}, \frac{2 + \varepsilon'}{3} \right)$$

and

$$\vec{p}_2 := \left( \frac{1}{3(k-1)}, \dots, \frac{1}{3(k-1)}, \frac{2}{3} \right).$$

The entropy difference between these two distributions is

$$\begin{aligned} H(\vec{p}_2) - H(\vec{p}_1) &= \frac{1 - \varepsilon'}{3} \log \frac{1 - \varepsilon'}{3(k-1)} + \frac{2 + \varepsilon'}{3} \log \frac{2 + \varepsilon'}{3} - \frac{1}{3} \log \frac{1}{3(k-1)} - \frac{2}{3} \log \frac{2}{3} \\ &= \frac{\varepsilon'}{3} \log(2(k-1)) + \frac{1 - \varepsilon'}{3} \log(1 - \varepsilon') + \frac{2 + \varepsilon'}{3} \log \frac{2 + \varepsilon'}{2} \\ &\geq \frac{\varepsilon'}{3} \log(2e^{-1}(k-1)). \end{aligned}$$

For sufficiently large  $k$ , choose  $\varepsilon' = 9\varepsilon/\log(2e^{-1}(k-1))$ . The difference between  $H(\vec{p}_1)$  and  $H(\vec{p}_2)$  is at least  $3\varepsilon$ .

On one hand, since  $\vec{p}_1$  and  $\vec{p}_2$  differ by  $2\varepsilon'/3$  in  $\ell_1$  distance, any algorithm that distinguishes the two distributions with confidence  $1 - \delta$  requires at least  $\Omega(\frac{1}{\varepsilon'^2} \log \frac{1}{\delta})$  samples. On the other hand, any entropy estimator  $\hat{f}$  that utilizes  $C_f(\hat{f}, \varepsilon, \delta)$  samples can be used to distinguish  $\vec{p}_1$  and  $\vec{p}_2$  with confidence  $1 - \delta$ . This yields the desired lower bound.

### Normalized support size

The lower bound follows from [8].

### Power sum

For any absolute constants  $\beta \in (0, 1)$  and  $a \in (1/2, 1)$ ,

$$\frac{k^{\frac{1}{a}}}{\varepsilon^{\frac{1}{a}} \log k} + \log \frac{1}{\delta} \cdot \frac{k^{2-2a}}{\varepsilon^2} \lesssim C_f(\varepsilon, \delta)$$

and

$$C_f(\varepsilon, \delta) \lesssim \frac{k^{\frac{1}{a}}}{\varepsilon^{\frac{1}{a}} \log k} + \left[ \left( \log \frac{1}{\delta} \cdot \frac{1}{\varepsilon^2} \right)^{\frac{1}{2a-1}} \right]^{1+\beta}.$$

The first part of the lower bound follows from [5]. Analogously, to show the second part of the lower bound, let  $\varepsilon'' \in (0, 1)$  be a parameter to be determined later, and consider the following two distributions in  $\Delta_k$ ,

$$\vec{p}_3 := \left( \frac{1 - \varepsilon''}{3(k-1)}, \dots, \frac{1 - \varepsilon''}{3(k-1)}, \frac{2 + \varepsilon''}{3} \right)$$

and

$$\vec{p}_2 := \left( \frac{1}{3(k-1)}, \dots, \frac{1}{3(k-1)}, \frac{2}{3} \right).$$

The difference between the power sums of these two distributions satisfies

$$\begin{aligned}
P_a(\vec{p}_2) - P_a(\vec{p}_3) &= (k-1) \left( \frac{1}{3(k-1)} \right)^a + \left( \frac{2}{3} \right)^a - (k-1) \left( \frac{1-\varepsilon''}{3(k-1)} \right)^a - \left( \frac{2+\varepsilon''}{3} \right)^a \\
&= \frac{(k-1)^{1-a}}{3^a} (1 - (1-\varepsilon'')^a) + \left( \frac{2}{3} \right)^a - \left( \frac{2+\varepsilon''}{3} \right)^a \\
&\geq \frac{(k-1)^{1-a}}{3^a} a \left( \varepsilon'' - \frac{\varepsilon''^2}{2} \right) + \left( \frac{2}{3} \right)^a \left( 1 - a \left( 1 + \frac{\varepsilon''}{2} \right) \right) \\
&\geq \frac{a\varepsilon''}{2 \cdot 3^a} ((k-1)^{1-a} - 2^a).
\end{aligned}$$

For  $k$  that is sufficiently large, choose parameter  $\varepsilon'' = 6\varepsilon \cdot 3^a / (a(k-1)^{1-a} - a \cdot 2^a)$ . The difference between  $P_a(\vec{p}_2)$  and  $P_a(\vec{p}_3)$  is at least  $3\varepsilon$ .

The desired lower bound follows from the same reasoning as in the Shannon-entropy case.

## References

- [1] J. Acharya, G. Kamath, Z. Sun, and H. Zhang. Inspectre: Privately estimating the unseen. *arXiv preprint arXiv:1803.00008*, 2018.
- [2] F. Chung, F. R. Chung, L. Lu, F. C. Graham, and K. F. Chung. *Complex graphs and networks*. No. 107. American Mathematical Soc., 2006.
- [3] R. A. DeVore. Degree of approximation. *Approximation theory II*, 241(242):117–161, 1976.
- [4] Y. Han, J. Jiao, and T. Weissman. Local moment matching: A unified methodology for symmetric functional estimation and distribution estimation under wasserstein distance. *arXiv preprint arXiv:1802.08405*, 2018.
- [5] J. Jiao, K. Venkat, Y. Han, and T. Weissman. Minimax estimation of functionals of discrete distributions. *IEEE Transactions on Information Theory*, 61.5:2835–2885, 2015.
- [6] J. Jiao, Y. Han, and T. Weissman. Minimax estimation of the  $\ell_1$  distance. *IEEE Transactions on Information Theory*, 2018.
- [7] C. McDiarmid. On the method of bounded differences. *Surveys in combinatorics*, 141.1:148–188, 1989.
- [8] Y. Wu and P. Yang. Chebyshev polynomials, moment matching, and optimal estimation of the unseen. *arXiv preprint arXiv:1504.01227*, 2015.
- [9] Y. Wu and P. Yang. Minimax rates of entropy estimation on large alphabets via best polynomial approximation. *IEEE Transactions on Information Theory*, 62.6:3702–3720, 2016.
